# Supplementary material for: Systematic identification of feature combinations for predicting drug response with Bayesian multi-view multi-task linear regression
Source: PubMed Central journal article supplement — Bioinformatics. 2017 Jul 12;33(14):i359–68. doi: 10.1093/bioinformatics/btx266 (PMC5870540; doi:10.1093/bioinformatics/btx266), 2017-07-12
Supplement: btx266_supp.pdf [file btx266_supp.pdf]

Supplementary Material

# Systematic identification of feature combinations for predicting drug response with Bayesian multi-view multi-task linear regression

Muhammad Ammad-ud-din<sup>1, 2\*</sup>, Suleiman A. Khan<sup>1, 2\*</sup>, Krister Wennerberg<sup>1</sup> and Tero Aittokallio<sup>1, 2, 3</sup>

<sup>1</sup>Institute for Molecular Medicine Finland FIMM, University of Helsinki, 00014 Helsinki, Finland

<sup>2</sup>Helsinki Institute for Information Technology HIIT, Department of Computer Science, Aalto University, 02150 Espoo, Finland

<sup>3</sup>Department of Mathematics and Statistics, University of Turku, 20014 Turku, Finland

\* Contributed Equally.

Associate Editor: XXXXXXXX

Received on XXXXX; revised on XXXXX; accepted on XXXXX

## Abstract

### Cancer Data Sets

#### GDSC

*Selection of the drug groups primarily on the basis of primary therapeutic targets:* We selected the drugs based on the information of primary therapeutic targets available from the GDSC project (Yang *et al.*, 2013). As we are using prior knowledge from the human cancer kinome, we focus our analysis to kinase inhibitors. As a first step, we computed the pairwise correlation of drugs belonging to the same target group and found significant differences in their values, Figure S2. Ideally, the drugs inhibiting same targets have similar responses, but this was not found. Upon closer inspection, we noticed that the number of cell line samples and screening date may have a noisy effect on the drug responses. Therefore, we re-organized the groups of drugs based on three criteria (1) similar target, (2) similar sample size and/or screening date, (3) negative correlation. In this way, we obtained 16 different drug groups as listed in Table S1. We observed high correlated drug responses in each of these groups, Figure S3.

#### FIMM

*Selection of the drug groups on the basis of primary therapeutic targets and responsiveness:* Gautam *et al.* (2016) published response measurements of 301 drugs on 19 cell lines. Among these 109 drugs belong to the broader class of kinase inhibitors. As a first step, we choose 109 kinase inhibitors belonging to 12 groups. We subsequently filter 6 drug groups that are responding in more than 80% of the cell lines, as shown in Figure S5 and are highly correlated (shown in Figure S6) as well. The names of FLNs

and the number of genes present in each of the FLNs, used for the case study with FIMM data set are illustrated in Figure S7.

### Empirical evidence of mean prediction correlation

Here we discuss the use of mean as a baseline prediction metric in drug response analysis, when using the generally used correlation and leave one out cross validation (LOOCV) settings (Azuaje, 2016). We observe that mean prediction of uncentered data, under LOOCV yields a correlation of -1, and should therefore be interpreted accordingly. In order to validate our observation, we generate 10000 random data sets with 100 samples each, and compute the mean prediction using LOOCV. We then compute the prediction performance using Spearman and Pearson correlations. The results confirm that the mean prediction correlation (pearson and spearman) is exactly -1 for all the random data sets. As these settings are used often in drug response prediction analysis, we therefore recommend that highly negative correlations be interpreted accordingly.

### References

- Azuaje, F. (2016) Computational models for predicting drug responses in cancer research. *Briefings in Bioinformatics*, **22** (8), bbw065.
- Benjamini, Y. and Hochberg, Y. (1995) Controlling the false discovery rate: a practical and powerful approach to multiple testing. *Journal of the Royal Statistical Society. Series B (Methodological)*, **57** (1), 289–300.
- Benjamini, Y. and Yekutieli, D. (2001) The control of the false discovery rate in multiple testing under dependency. *Annals of Statistics*, **29** (4), 1165–1188.
- Gautam, P., Karhinen, L., Szwajda, A., Jha, S.K., Yadav, B., Aittokallio, T. and Wennerberg, K. (2016) Identification of selective cytotoxic and synthetic lethal

drug responses in triple negative breast cancer cells. *Molecular cancer*, **15** (1), 1.  
Yang,W., Soares,J., Greninger,P., Edelman,E.J., Lightfoot,H., Forbes,S., Bindal,N.,  
Beare,D., Smith,J.A., Thompson,I.R. et al. (2013) Genomics of drug sensitivity  
in cancer (GDSC): a resource for therapeutic biomarker discovery in cancer cells.  
*Nucleic Acids Res.*, **41** (D1), D955–D961.

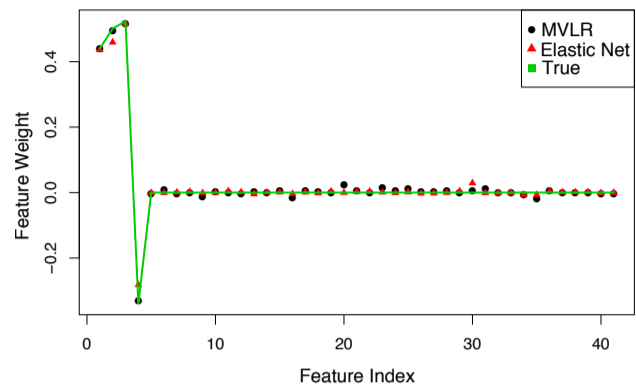

**Fig. S1.** We also validate our model on single-view data sets, confirming that it performs comparably to the existing methods in identifying analogous and correct set of features in the synthetic data.

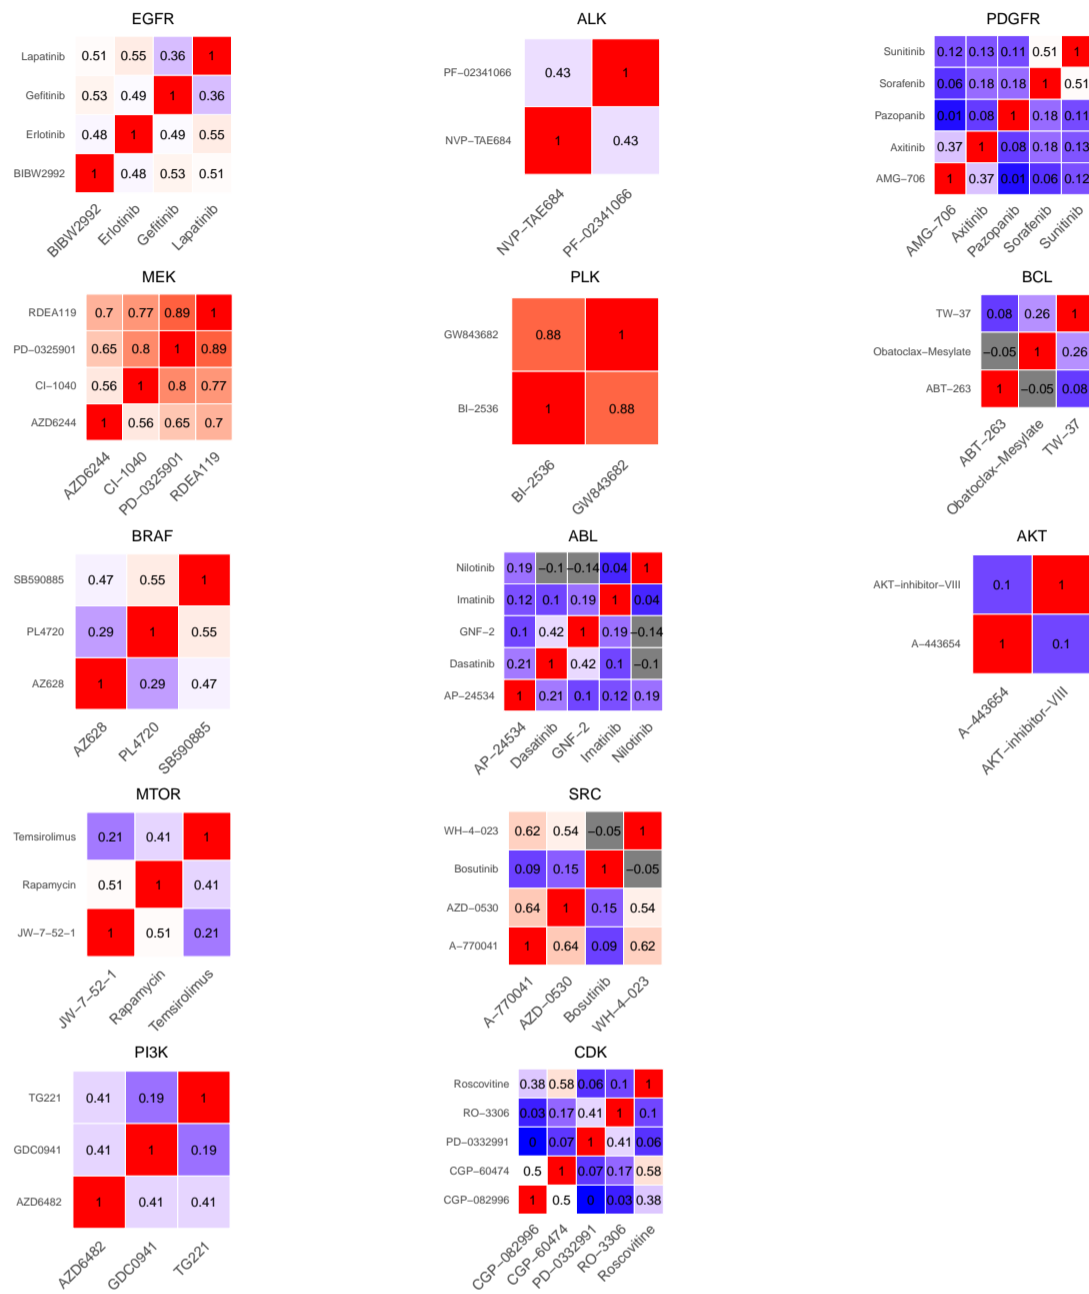

**Fig. S2.** Pairwise correlation of drug responses grouped by similar primary targets. Among EGFR inhibitors, lapatinib and gefitinib are poorly correlated, compared to lapatinib and erlotinib. Likewise, erlotinib and BIBW2992 are less correlated compared to BIBW2992 and gefitinib. Similar, patterns are seen in CDK, PDGFR, SRC and ABL inhibitors.

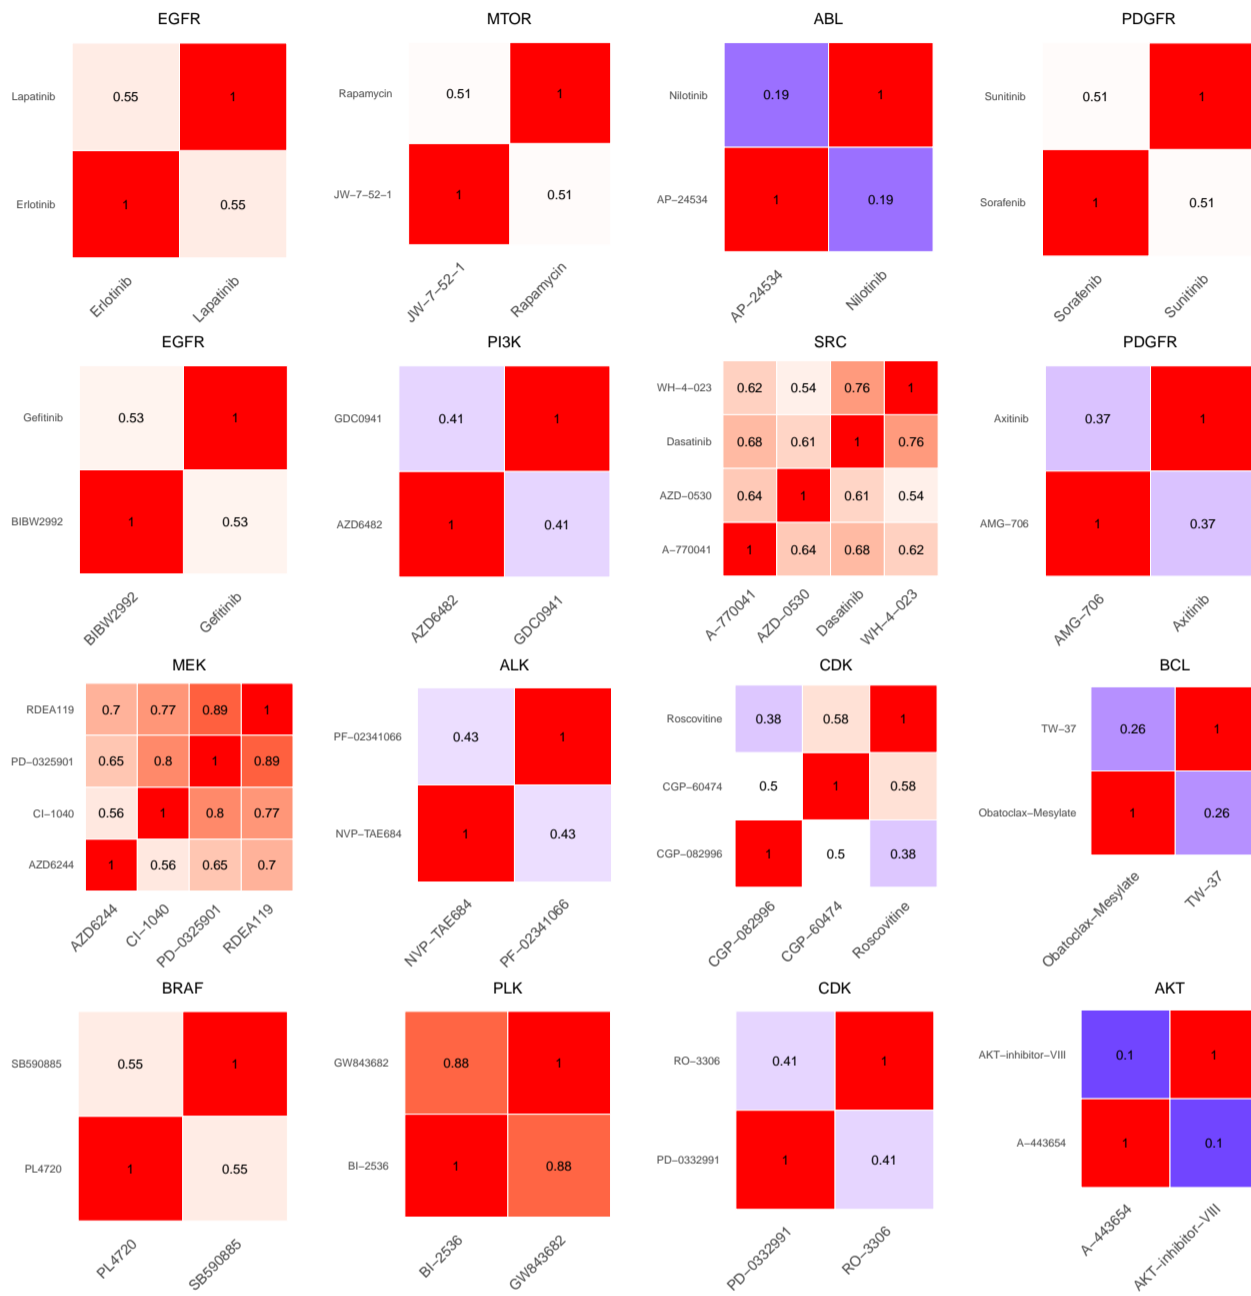

**Fig. S3.** Pairwise correlation of drug responses grouped by similar primary targets, sample size and screening date. Further details are given in Table S1 and in the text

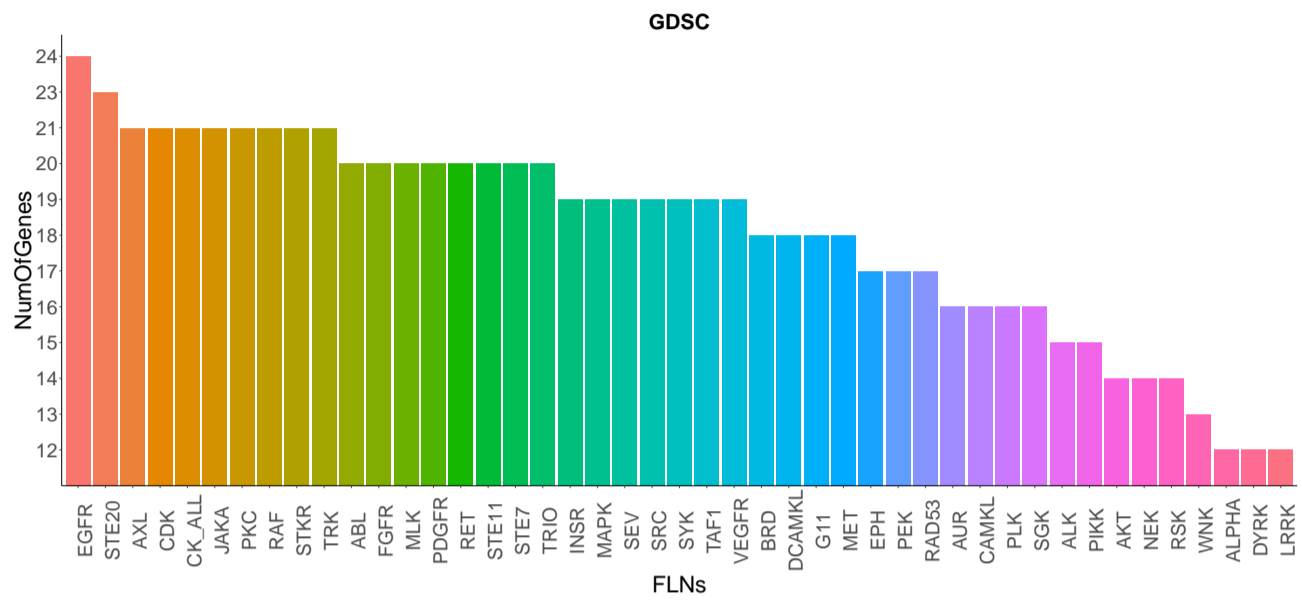

**Fig. S4.** Number of genes (y-axis) present in each of the FLNs (x-axis) used for the case study with GDSC data set.

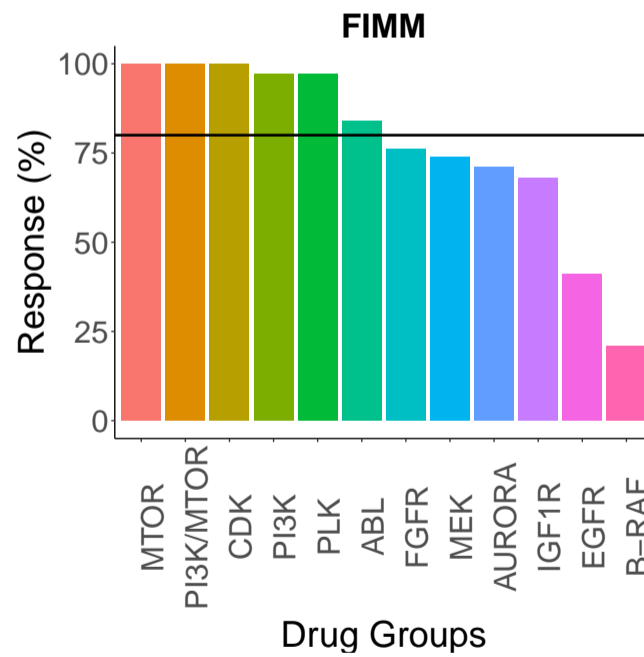

**Fig. S5.** Percentage of response (y-axis) observed in each of the drug groups (x-axis) for the case of the FIMM data set. The drug group showing response in more than 80% of the cell lines are selected for the analysis.

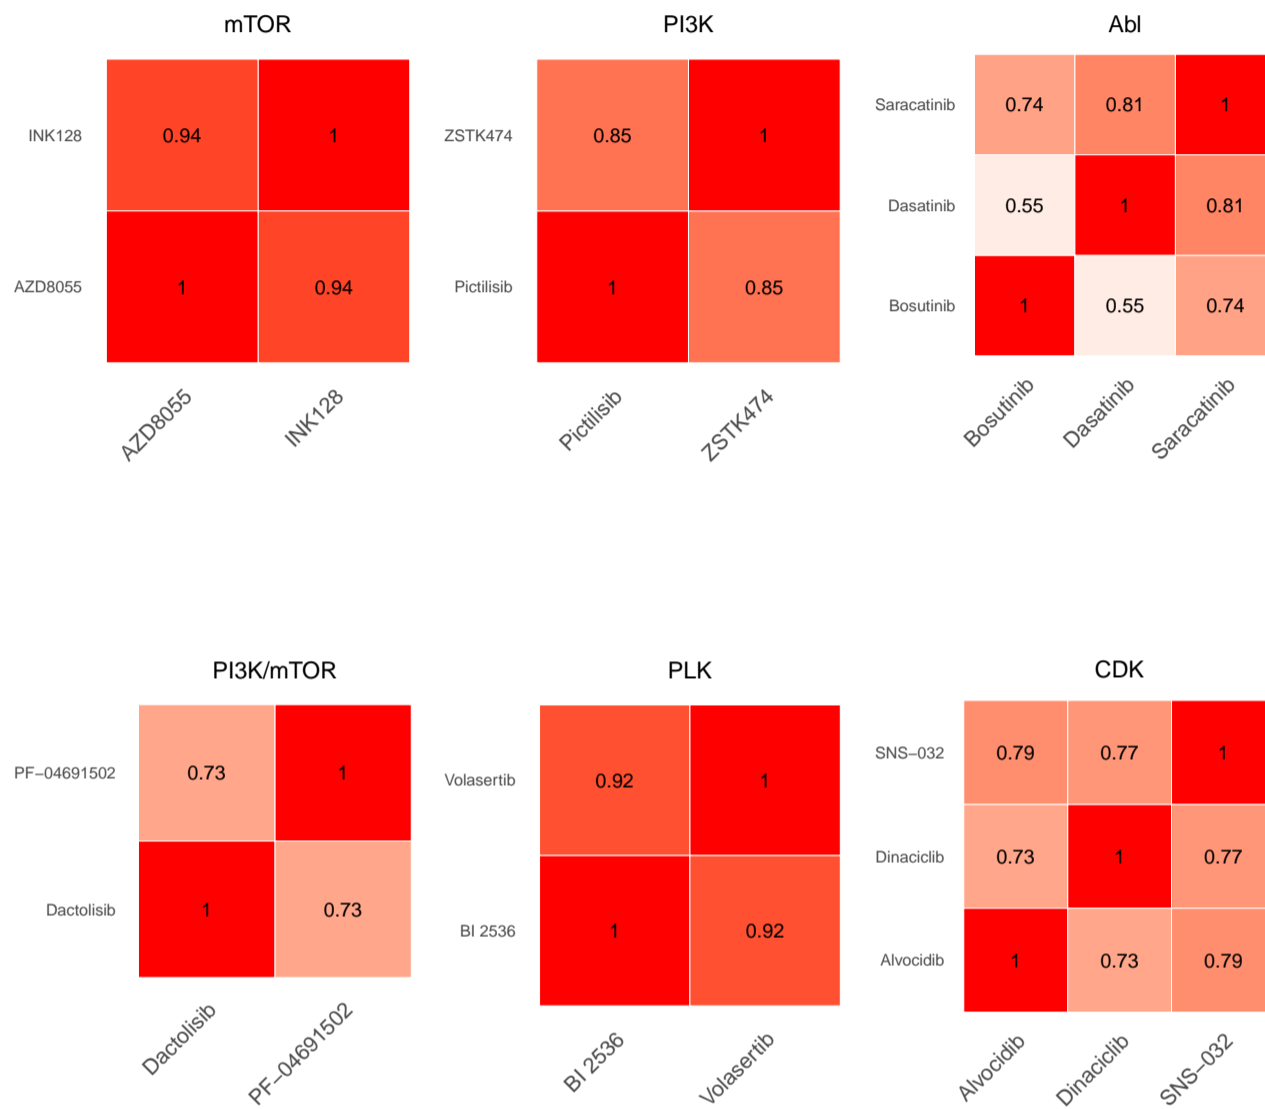

**Fig. S6.** Pairwise correlation of drug responses grouped by primary targets. The drugs show high correlated response pattern in each of the groups.

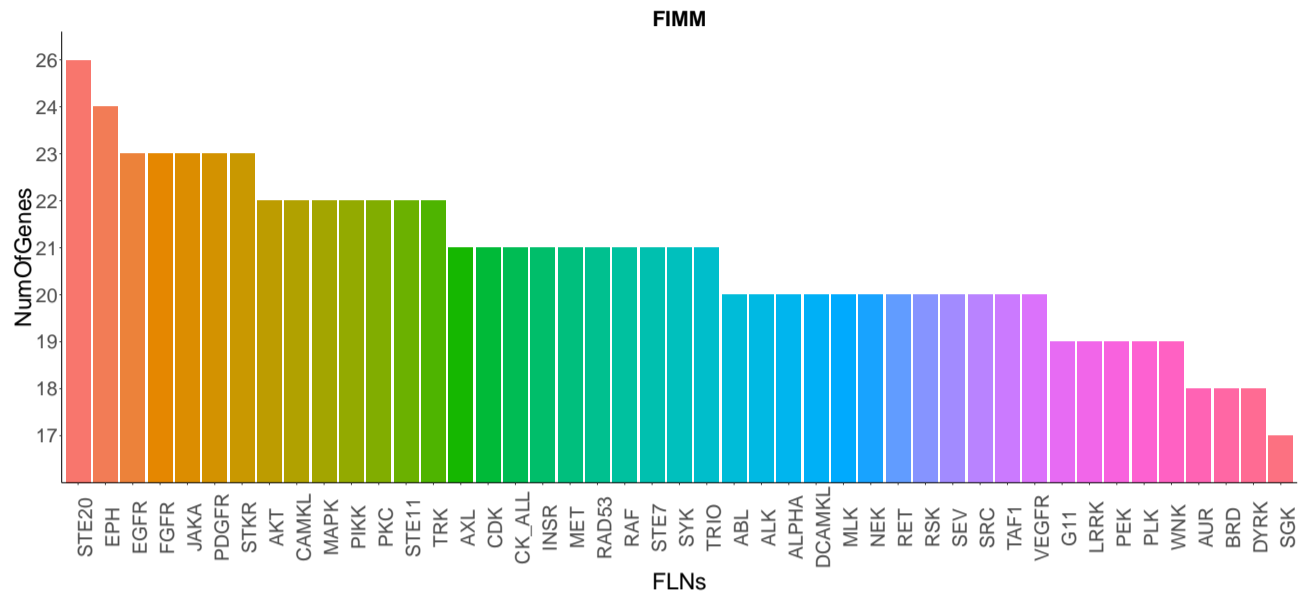

**Fig. S7.** Number of genes (y-axis) present in each of the FLNs (x-axis) used for the case study with FIMM data set..



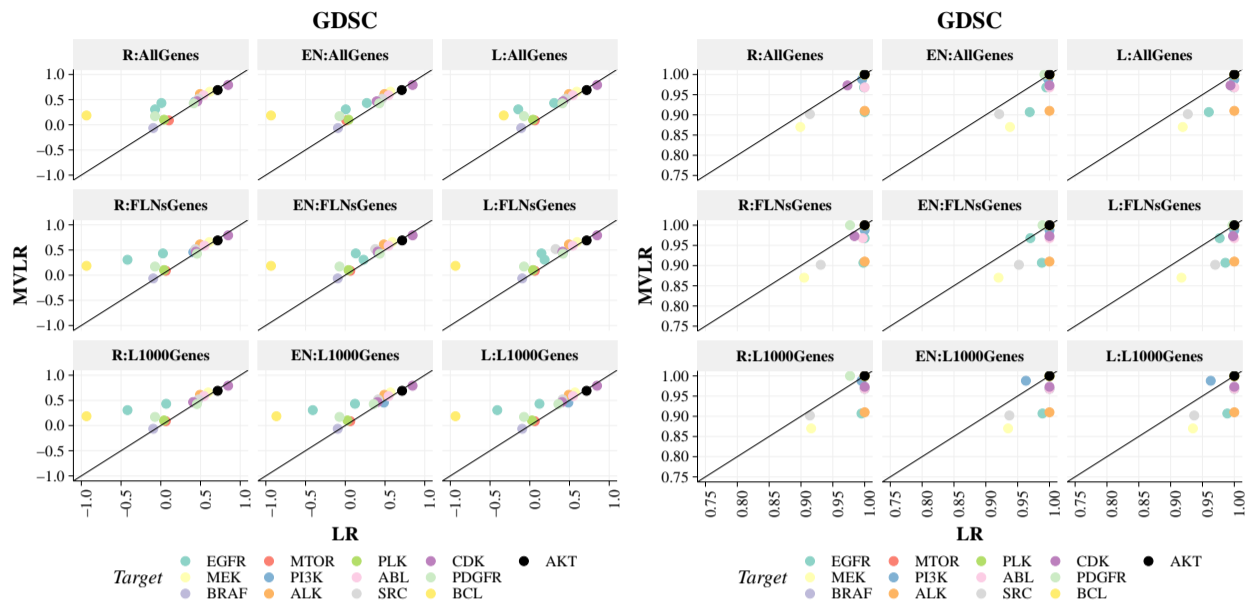

**Fig. S8.** Prediction Performance of individual drug groups colored according to their primary target, computed across cell lines in GDSC data set. Left: Pearson Correlation, Right: RMSE. Method abbreviations are explained in Table 2 (in the manuscript). The performance obtained by MVLRLR (shown on y-axis) is found to be significantly higher than the others shown on x-axis ( $p < 0.01$ ; one-sided paired Wilcoxon Sign-Rank test corrected for multiple testing). Here -1 denotes the baseline performance, computed using the mean of the training drug response data as predictions.

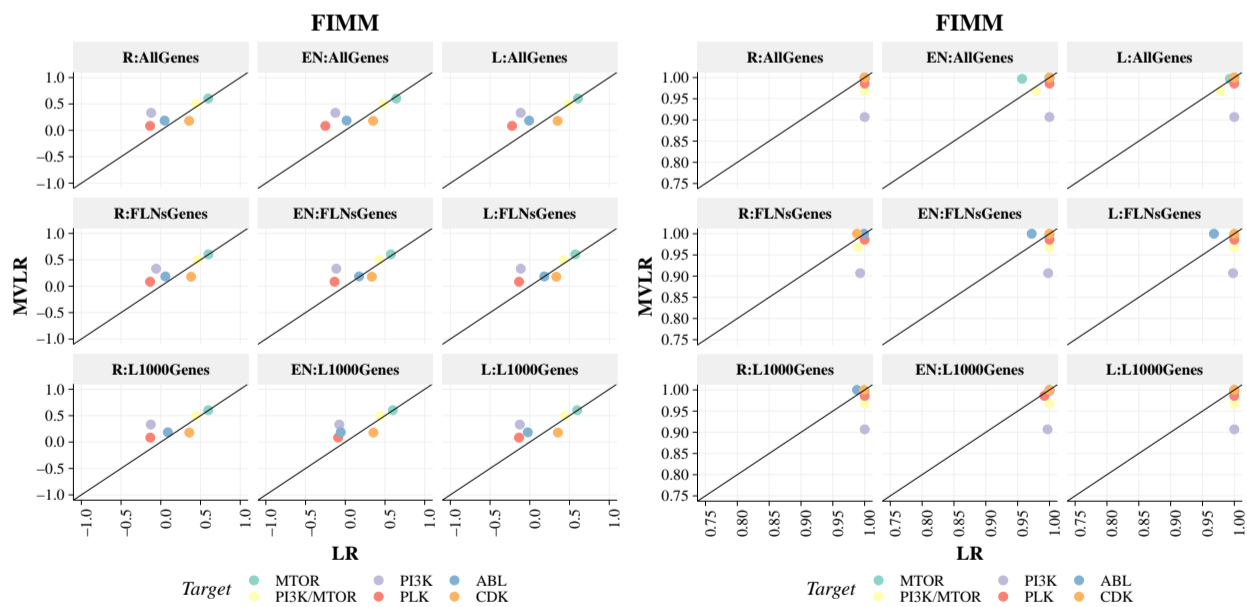

**Fig. S9.** Prediction Performance of individual drug groups colored according to their primary target, computed across cell lines in FIMM data set. Left: Pearson Correlation, Right: RMSE. Method abbreviations are explained in Table 2 (in the manuscript). Here 1 denotes the baseline performance, computed using the mean of the training drug response data as predictions.

Table S1. GDSC data set: drugs and their 16 target-based groups organized by the sample size and screening date. This information is available at the GDSC server.

| Name               | Targets                        | Sample.size | Last.screening.date |
|--------------------|--------------------------------|-------------|---------------------|
| Erlotinib          | EGFR                           | 323         | 16-MAR-12           |
| Lapatinib          | EGFR, ERBB2                    | 348         | 16-MAR-12           |
| Gefitinib          | EGFR                           | 663         | 05-FEB-13           |
| BIBW2992           | EGFR, ERBB2                    | 663         | 05-FEB-13           |
| RDEA119            | MEK1/2                         | 654         | 05-FEB-13           |
| CI-1040            | MEK1/2                         | 659         | 05-FEB-13           |
| PD-0325901         | MEK1/2                         | 654         | 05-FEB-13           |
| AZD6244            | MEK1/2                         | 633         | 05-FEB-13           |
| PLX4720            | BRAF                           | 661         | 05-FEB-13           |
| SB590885           | BRAF                           | 641         | 05-FEB-13           |
| Rapamycin          | MTOR                           | 357         | 16-MAR-12           |
| JW-7-52-1          | MTOR                           | 356         | 16-MAR-12           |
| GDC0941            | PI3K (class 1)                 | 652         | 05-FEB-13           |
| AZD6482            | PI3Kb (P3C2B)                  | 672         | 14-MAY-12           |
| NVP-TAE684         | ALK                            | 357         | 16-MAR-12           |
| PF-02341066        | MET, ALK                       | 357         | 16-MAR-12           |
| GW843682X          | PLK1                           | 356         | 16-MAR-12           |
| BI-2536            | PLK1/2/3                       | 356         | 16-MAR-12           |
| AP-24534           | ABL                            | 672         | 14-MAY-12           |
| Nilotinib          | ABL                            | 645         | 05-FEB-13           |
| Dasatinib          | ABL, SRC, KIT, PDGFR           | 355         | 16-MAR-12           |
| A-770041           | SRC family                     | 356         | 16-MAR-12           |
| WH-4-023           | SRC family, ABL                | 355         | 16-MAR-12           |
| AZD-0530           | SRC, ABL1                      | 359         | 16-MAR-12           |
| CGP-60474          | CDK1/2/5/7/9                   | 355         | 16-MAR-12           |
| CGP-082996         | CDK4                           | 355         | 16-MAR-12           |
| Roscovitine        | CDKs                           | 348         | 16-MAR-12           |
| RO-3306            | CDK1                           | 661         | 05-FEB-13           |
| PD-0332991         | CDK4/6                         | 633         | 05-FEB-13           |
| Sunitinib          | PDGFRA, PDGFRB, KDR, KIT, FLT3 | 355         | 16-MAR-12           |
| Sorafenib          | PDGFRA, PDGFRB, KDR, KIT, FLT3 | 354         | 16-MAR-12           |
| Axitinib           | PDGFR, KIT, VEGFR              | 663         | 05-FEB-13           |
| AMG-706            | VEGFR, RET, c-KIT, PDGFR       | 661         | 05-FEB-13           |
| TW 37              | BCL-2, BCL-XL                  | 653         | 05-FEB-13           |
| Obatoclox Mesylate | BCL-2, BCL-XL, MCL-1           | 665         | 14-MAY-12           |
| AKT inhibitor VIII | AKT1/2                         | 672         | 14-MAY-12           |
| A-443654           | AKT1/2/3                       | 355         | 16-MAR-12           |

Table S2. Spearman correlations of predictions for individual drug groups in GDSC data set.

|       | MVLR:FLNs | R:AllGenes | EN:AllGenes | L:AllGenes | R:FLNsGenes | EN:FLNsGenes | L:FLNsGenes | R:L1000Genes | EN:L1000Genes | L:L1000Genes |
|-------|-----------|------------|-------------|------------|-------------|--------------|-------------|--------------|---------------|--------------|
| EGFR  | 0.408     | -0.289     | 0.302       | 0.366      | -0.085      | 0.201        | 0.202       | 0.074        | 0.167         | 0.167        |
| EGFR  | 0.218     | -0.189     | -0.002      | -0.161     | -0.376      | 0.272        | 0.233       | -0.376       | -0.362        | -0.362       |
| MEK   | 0.662     | 0.631      | 0.574       | 0.606      | 0.627       | 0.596        | 0.597       | 0.613        | 0.57          | 0.57         |
| BRAF  | -0.09     | -0.53      | -0.375      | -0.531     | -0.53       | -0.53        | -0.53       | -0.53        | -0.53         | -0.53        |
| MTOR  | 0.079     | 0.052      | -0.233      | -0.334     | -0.334      | -0.334       | -0.334      | -0.334       | -0.334        | -0.334       |
| PI3K  | 0.443     | 0.385      | 0.317       | 0.186      | 0.041       | -0.082       | -0.083      | 0.373        | 0.451         | 0.451        |
| ALK   | 0.562     | 0.01       | 0.021       | 0.01       | 0.01        | 0.01         | 0.01        | 0.01         | 0.011         | 0.011        |
| PLK   | 0.151     | -0.367     | -0.367      | -0.367     | -0.367      | -0.367       | -0.367      | -0.367       | -0.367        | -0.367       |
| ABL   | 0.598     | 0.117      | 0.116       | 0.12       | 0.51        | 0.123        | 0.181       | 0.123        | 0.116         | 0.116        |
| SRC   | 0.444     | 0.353      | 0.339       | 0.334      | 0.335       | 0.313        | 0.286       | 0.357        | 0.332         | 0.332        |
| CDK   | 0.657     | 0.523      | 0.523       | 0.523      | 0.523       | 0.523        | 0.523       | 0.523        | 0.524         | 0.524        |
| CDK   | 0.443     | 0.306      | 0.088       | 0.319      | 0.245       | -0.118       | -0.077      | -0.118       | -0.118        | -0.118       |
| PDGFR | 0.214     | -0.425     | -0.425      | -0.425     | -0.425      | -0.425       | -0.425      | -0.425       | -0.425        | -0.425       |
| PDGFR | 0.435     | 0.321      | 0.384       | -0.003     | 0.463       | 0.389        | 0.31        | 0.466        | 0.316         | 0.31         |
| BCL   | 0.173     | -0.881     | -0.881      | -0.881     | -0.881      | -0.881       | -0.881      | -0.881       | -0.874        | -0.881       |
| AKT   | 0.599     | 0.274      | 0.287       | 0.274      | 0.274       | 0.274        | 0.274       | 0.274        | 0.289         | 0.289        |

Table S3. Pearson correlations of predictions for individual drug groups in GDSC data set.

|       | MVLR:FLNs | R:AllGenes | EN:AllGenes | L:AllGenes | R:FLNsGenes | EN:FLNsGenes | L:FLNsGenes | R:L1000Genes | EN:L1000Genes | L:L1000Genes |
|-------|-----------|------------|-------------|------------|-------------|--------------|-------------|--------------|---------------|--------------|
| EGFR  | 0.433     | 0.008      | 0.271       | 0.307      | 0.027       | 0.132        | 0.147       | 0.068        | 0.122         | 0.122        |
| EGFR  | 0.307     | -0.072     | 0.006       | -0.145     | -0.419      | 0.23         | 0.187       | -0.419       | -0.409        | -0.409       |
| MEK   | 0.658     | 0.617      | 0.568       | 0.591      | 0.611       | 0.592        | 0.596       | 0.597        | 0.569         | 0.569        |
| BRAF  | -0.064    | -0.095     | -0.092      | -0.108     | -0.095      | -0.095       | -0.095      | -0.095       | -0.095        | -0.095       |
| MTOR  | 0.087     | 0.102      | 0.012       | 0.063      | 0.063       | 0.063        | 0.063       | 0.063        | 0.063         | 0.063        |
| PI3K  | 0.457     | 0.428      | 0.423       | 0.415      | 0.409       | 0.408        | 0.42        | 0.429        | 0.486         | 0.486        |
| ALK   | 0.611     | 0.493      | 0.493       | 0.493      | 0.493       | 0.485        | 0.493       | 0.493        | 0.491         | 0.491        |
| PLK   | 0.102     | 0.041      | 0.041       | 0.041      | 0.041       | 0.041        | 0.041       | 0.041        | 0.028         | 0.028        |
| ABL   | 0.586     | 0.539      | 0.545       | 0.542      | 0.549       | 0.545        | 0.541       | 0.544        | 0.545         | 0.545        |
| SRC   | 0.519     | 0.474      | 0.464       | 0.453      | 0.436       | 0.377        | 0.325       | 0.474        | 0.413         | 0.413        |
| CDK   | 0.792     | 0.848      | 0.848       | 0.848      | 0.848       | 0.848        | 0.848       | 0.848        | 0.847         | 0.847        |
| CDK   | 0.467     | 0.459      | 0.395       | 0.419      | 0.44        | 0.407        | 0.411       | 0.407        | 0.407         | 0.407        |
| PDGFR | 0.172     | -0.073     | -0.073      | -0.073     | -0.073      | -0.073       | -0.073      | -0.073       | -0.073        | -0.073       |
| PDGFR | 0.427     | 0.414      | 0.428       | 0.41       | 0.456       | 0.433        | 0.417       | 0.455        | 0.358         | 0.36         |
| BCL   | 0.186     | -0.935     | -0.935      | -0.328     | -0.935      | -0.935       | -0.935      | -0.935       | -0.867        | -0.935       |
| AKT   | 0.691     | 0.716      | 0.711       | 0.716      | 0.716       | 0.716        | 0.716       | 0.716        | 0.715         | 0.715        |

Table S4. RMSE of predictions for individual drug groups in GDSC data set. For simplicity, the value greater than 1 have been set to 1 for all methods.

|       | MVLR:FLNs | R:AllGenes | EN:AllGenes | L:AllGenes | R:FLNsGenes | EN:FLNsGenes | L:FLNsGenes | R:L1000Genes | EN:L1000Genes | L:L1000Genes |
|-------|-----------|------------|-------------|------------|-------------|--------------|-------------|--------------|---------------|--------------|
| EGFR  | 0.907     | 1          | 0.969       | 0.96       | 0.998       | 0.988        | 0.986       | 0.995        | 0.989         | 0.989        |
| EGFR  | 0.968     | 0.999      | 0.995       | 0.999      | 1           | 0.97         | 0.977       | 1            | 1             | 1            |
| MEK   | 0.87      | 0.899      | 0.938       | 0.919      | 0.905       | 0.92         | 0.917       | 0.916        | 0.935         | 0.935        |
| BRAF  | 1         | 1          | 1           | 1          | 1           | 1            | 1           | 1            | 1             | 1            |
| MTOR  | 1         | 1          | 1           | 1          | 1           | 1            | 1           | 1            | 1             | 1            |
| PI3K  | 0.988     | 0.996      | 0.998       | 1          | 1           | 1            | 1           | 0.995        | 0.963         | 0.963        |
| ALK   | 0.91      | 1          | 1           | 1          | 1           | 1            | 1           | 1            | 1             | 1            |
| PLK   | 1         | 1          | 1           | 1          | 1           | 1            | 1           | 1            | 1             | 1            |
| ABL   | 0.968     | 1          | 1           | 1          | 0.997       | 1            | 1           | 1            | 1             | 1            |
| SRC   | 0.902     | 0.914      | 0.921       | 0.927      | 0.931       | 0.952        | 0.97        | 0.914        | 0.937         | 0.937        |
| CDK   | 1         | 1          | 1           | 1          | 1           | 1            | 1           | 1            | 1             | 1            |
| CDK   | 0.973     | 0.973      | 1           | 0.994      | 0.984       | 1            | 0.998       | 1            | 1             | 1            |
| PDGFR | 1         | 1          | 1           | 1          | 1           | 1            | 1           | 1            | 1             | 1            |
| PDGFR | 1         | 0.999      | 0.992       | 1          | 0.977       | 0.989        | 0.997       | 0.977        | 1             | 1            |
| BCL   | 0.999     | 1          | 1           | 1          | 1           | 1            | 1           | 1            | 1             | 1            |
| AKT   | 1         | 1          | 1           | 1          | 1           | 1            | 1           | 1            | 1             | 1            |

Table S5. Statistical significance of the predictive performances on the GDSC data set. P-values from one-sided paired Wilcoxon Sign-Rank test corresponding to the values shown in Figures 3 (in manuscript), Figure S8 (in sup mat), corrected for multiple testing using Benjamini, Hochberg, and Yekutieli's method (Benjamini and Hochberg, 1995; Benjamini and Yekutieli, 2001).

|                      | R:AllGenes            | EN:AllGenes           | L:AllGenes            | R:FLNsGenes           | EN:FLNsGenes          | L:FLNsGenes           | R:L1000Genes          | EN:L1000Genes         | L:L1000Genes          |
|----------------------|-----------------------|-----------------------|-----------------------|-----------------------|-----------------------|-----------------------|-----------------------|-----------------------|-----------------------|
| Spearman Correlation | $3.29 \times 10^{-4}$ |
| Pearson Correlation  | $4.51 \times 10^{-3}$ | $2.61 \times 10^{-3}$ | $2.61 \times 10^{-3}$ | $3.73 \times 10^{-3}$ | $2.61 \times 10^{-3}$ | $2.61 \times 10^{-3}$ | $3.36 \times 10^{-3}$ | $2.61 \times 10^{-3}$ | $2.61 \times 10^{-3}$ |
| RMSE                 | $9.49 \times 10^{-3}$ |

Table S6. Spearman correlations of predictions for individual drug groups in FIMM data set.

|           | MVLR:FLNs | R:AllGenes | EN:AllGenes | L:AllGenes | R:FLNsGenes | EN:FLNsGenes | L:FLNsGenes | R:L1000Genes | EN:L1000Genes | L:L1000Genes |
|-----------|-----------|------------|-------------|------------|-------------|--------------|-------------|--------------|---------------|--------------|
| MTOR      | 0.566     | 0.262      | 0.553       | 0.35       | 0.289       | 0.276        | 0.265       | 0.262        | 0.262         | 0.262        |
| PI3K/MTOR | 0.533     | 0.088      | 0.235       | 0.235      | 0.214       | 0.121        | 0.098       | 0.096        | 0.089         | 0.089        |
| PI3K      | 0.362     | -0.274     | -0.169      | -0.15      | -0.051      | -0.273       | -0.273      | -0.266       | -0.129        | -0.19        |
| PLK       | 0.132     | -0.291     | -0.354      | -0.369     | -0.291      | -0.289       | -0.289      | -0.291       | -0.26         | -0.291       |
| ABL       | 0.219     | -0.127     | -0.072      | -0.123     | -0.034      | 0.038        | -0.009      | -0.018       | -0.304        | -0.308       |
| CDK       | 0.202     | 0.158      | 0.206       | 0.175      | 0.246       | 0.227        | 0.227       | 0.213        | 0.201         | 0.201        |

Table S7. Pearson correlations of predictions for individual drug groups in FIMM data set.

|           | MVLR:FLNs | R:AllGenes | EN:AllGenes | L:AllGenes | R:FLNsGenes | EN:FLNsGenes | L:FLNsGenes | R:L1000Genes | EN:L1000Genes | L:L1000Genes |
|-----------|-----------|------------|-------------|------------|-------------|--------------|-------------|--------------|---------------|--------------|
| MTOR      | 0.604     | 0.598      | 0.642       | 0.607      | 0.6         | 0.574        | 0.574       | 0.598        | 0.598         | 0.598        |
| PI3K/MTOR | 0.499     | 0.445      | 0.479       | 0.479      | 0.461       | 0.426        | 0.426       | 0.444        | 0.445         | 0.445        |
| PI3K      | 0.332     | -0.121     | -0.125      | -0.114     | -0.059      | -0.113       | -0.113      | -0.126       | -0.075        | -0.125       |
| PLK       | 0.085     | -0.135     | -0.251      | -0.223     | -0.135      | -0.135       | -0.135      | -0.132       | -0.09         | -0.135       |
| ABL       | 0.185     | 0.048      | 0.017       | -0.008     | 0.058       | 0.174        | 0.183       | 0.089        | -0.057        | -0.025       |
| CDK       | 0.18      | 0.357      | 0.35        | 0.35       | 0.382       | 0.334        | 0.334       | 0.359        | 0.354         | 0.354        |

Table S8. RMSE of predictions for individual drug groups in FIMM data set. For simplicity, the value greater than 1 have been set to 1 for all methods.

| r         | MVLR:FLNs | R:AllGenes | EN:AllGenes | L:AllGenes | R:FLNsGenes | EN:FLNsGenes | L:FLNsGenes | R:L1000Genes | EN:L1000Genes | L:L1000Genes |
|-----------|-----------|------------|-------------|------------|-------------|--------------|-------------|--------------|---------------|--------------|
| MTOR      | 0.997     | 1          | 0.957       | 0.993      | 0.998       | 1            | 1           | 1            | 1             | 1            |
| PI3K/MTOR | 0.968     | 1          | 0.979       | 0.979      | 0.99        | 1            | 1           | 1            | 1             | 1            |
| PI3K      | 0.907     | 1          | 1           | 1          | 0.993       | 0.998        | 0.998       | 1            | 0.997         | 1            |
| PLK       | 0.986     | 1          | 1           | 1          | 1           | 1            | 1           | 1            | 0.992         | 1            |
| ABL       | 1         | 1          | 1           | 1          | 0.999       | 0.972        | 0.968       | 0.988        | 1             | 1            |
| CDK       | 1         | 1          | 1           | 1          | 0.988       | 1            | 1           | 0.999        | 1             | 1            |

Table S9. Statistical significance of the predictive performances on the FIMM data set. P-values from one-sided paired Wilcoxon Sign-Rank test corresponding to the values shown in Figures 3 (in the manuscript), Figure S9 (in sup mat), corrected for multiple testing using Benjamini, Hochberg, and Yekutieli's method (Benjamini and Hochberg, 1995; Benjamini and Yekutieli, 2001).

|                      | R:AllGenes            | EN:AllGenes           | L:AllGenes            | R:FLNsGenes           | EN:FLNsGenes          | L:FLNsGenes           | R:L1000Genes          | EN:L1000Genes         | L:L1000Genes          |
|----------------------|-----------------------|-----------------------|-----------------------|-----------------------|-----------------------|-----------------------|-----------------------|-----------------------|-----------------------|
| Spearman Correlation | $2.96 \times 10^{-2}$ |
| Pearson Correlation  | $1.71 \times 10^{-1}$ | $2.01 \times 10^{-1}$ | $1.71 \times 10^{-1}$ |
| RMSE                 | $1.51 \times 10^{-1}$ | $2.92 \times 10^{-1}$ | $1.80 \times 10^{-1}$ | $1.80 \times 10^{-1}$ | $1.80 \times 10^{-1}$ | $1.93 \times 10^{-1}$ | $1.80 \times 10^{-1}$ | $1.51 \times 10^{-1}$ | $1.51 \times 10^{-1}$ |

Table S10. Prediction correlation (mean  $\pm$  sd) and average standard deviation of the LOOCV estimates over 10 runs of our algorithm. To evaluate the reliability of the model predictions over multiple runs, we compute the variances of the LOOCV estimates on the TNBC data set. Specifically, the model is run with random seeds 10 times in a LOOCV setting to estimate the predictions. The average prediction correlation along with its standard deviation are shown demonstrating that the prediction performance is similar across multiple runs. We also show the average standard deviation of the prediction estimates across each drug group.

|                                               | MTOR             | PI3K/MTOR        | PI3K             | PLK             | ABL             | CDK              |
|-----------------------------------------------|------------------|------------------|------------------|-----------------|-----------------|------------------|
| Prediction correlation                        | 0.58 $\pm$ 0.076 | 0.54 $\pm$ 0.055 | 0.28 $\pm$ 0.119 | 0.04 $\pm$ 0.11 | 0.3 $\pm$ 0.097 | 0.36 $\pm$ 0.092 |
| Average Standard Deviation of LOOCV estimates | 0.049            | 0.09             | 0.15             | 0.101           | 0.193           | 0.149            |

Table S11. Spearman correlations of predictions for individual drug groups in GDSC data set in comparison to Random Forest (RF), sparse Partial Least Squares (sPLS), Sparse Group Lasso (SGL) and Support Vector Machine (SVM).

|                     | MVLR   | RF    | sPLS   | SVM    | SGL   |
|---------------------|--------|-------|--------|--------|-------|
| EGFR                | 0.408  | 0.400 | 0.414  | 0.352  | 0.278 |
| EGFR                | 0.218  | 0.128 | 0.287  | 0.156  | 0.121 |
| MEK                 | 0.662  | 0.685 | 0.680  | 0.661  | 0.643 |
| BRAF                | -0.090 | 0.089 | -0.111 | -0.042 | 0.133 |
| MTOR                | 0.079  | 0.119 | -0.039 | 0.221  | 0.086 |
| PI3K                | 0.443  | 0.407 | 0.426  | 0.461  | 0.338 |
| ALK                 | 0.562  | 0.480 | 0.380  | 0.419  | 0.411 |
| PLK                 | 0.151  | 0.077 | 0.067  | 0.055  | 0.039 |
| ABL                 | 0.598  | 0.549 | 0.517  | 0.578  | 0.558 |
| SRC                 | 0.444  | 0.369 | 0.290  | 0.347  | 0.348 |
| CDK                 | 0.657  | 0.716 | 0.667  | 0.711  | 0.661 |
| CDK                 | 0.443  | 0.423 | 0.474  | 0.478  | 0.451 |
| PDGFR               | 0.214  | 0.023 | 0.190  | 0.053  | 0.018 |
| PDGFR               | 0.435  | 0.500 | 0.371  | 0.467  | 0.419 |
| BCL                 | 0.173  | 0.160 | 0.102  | 0.235  | 0.226 |
| AKT                 | 0.599  | 0.618 | 0.570  | 0.659  | 0.674 |
| Average Correlation | 0.375  | 0.359 | 0.330  | 0.363  | 0.338 |

Table S12. Pearson correlations of predictions for individual drug groups in GDSC data set in comparison to Random Forest (RF), sparse Partial Least Squares (sPLS), Sparse Group Lasso (SGL) and Support Vector Machine (SVM).

|                     | MVLR   | RF    | sPLS   | SVM    | SGL    |
|---------------------|--------|-------|--------|--------|--------|
| EGFR                | 0.433  | 0.352 | 0.385  | 0.352  | 0.318  |
| EGFR                | 0.307  | 0.319 | 0.342  | 0.001  | 0.162  |
| MEK                 | 0.658  | 0.666 | 0.666  | 0.657  | 0.643  |
| BRAF                | -0.064 | 0.13  | -0.121 | -0.027 | 0.105  |
| MTOR                | 0.087  | 0.091 | -0.013 | 0.16   | 0.092  |
| PI3K                | 0.457  | 0.435 | 0.44   | 0.482  | 0.354  |
| ALK                 | 0.611  | 0.513 | 0.422  | 0.459  | 0.419  |
| PLK                 | 0.102  | 0.085 | 0.063  | 0.158  | -0.001 |
| ABL                 | 0.586  | 0.549 | 0.483  | 0.559  | 0.493  |
| SRC                 | 0.519  | 0.505 | 0.409  | 0.475  | 0.437  |
| CDK                 | 0.792  | 0.846 | 0.819  | 0.849  | 0.787  |
| CDK                 | 0.467  | 0.46  | 0.49   | 0.504  | 0.478  |
| PDGFR               | 0.172  | 0.004 | 0.182  | -0.026 | 0.011  |
| PDGFR               | 0.427  | 0.508 | 0.35   | 0.463  | 0.404  |
| BCL                 | 0.186  | 0.178 | 0.111  | 0.001  | 0.189  |
| AKT                 | 0.691  | 0.704 | 0.659  | 0.652  | 0.687  |
| Average Correlation | 0.402  | 0.397 | 0.355  | 0.357  | 0.349  |

Table S13. RMSE of predictions for individual drug groups in GDSC data set in comparison to Random Forest (RF), sparse Partial Least Squares (sPLS), Sparse Group Lasso (SGL) and Support Vector Machine (SVM).

|              | MVLR  | RF    | sPLS  | SVM     | SGL   |
|--------------|-------|-------|-------|---------|-------|
| EGFR         | 0.907 | 0.933 | 0.925 | 0.933   | 1.018 |
| EGFR         | 0.968 | 0.943 | 0.952 | 10.154  | 1.119 |
| MEK          | 0.87  | 0.852 | 0.856 | 0.857   | 0.893 |
| BRAF         | 1.112 | 0.993 | 1.142 | 480.971 | 1.102 |
| MTOR         | 1.07  | 1.01  | 1.137 | 1.011   | 1.14  |
| PI3K         | 0.988 | 0.994 | 0.995 | 0.972   | 1.103 |
| ALK          | 0.91  | 0.988 | 1.059 | 1.03    | 1.094 |
| PLK          | 1.108 | 1.011 | 1.132 | 112.558 | 1.197 |
| ABL          | 0.968 | 0.998 | 1.058 | 0.994   | 1.099 |
| SRC          | 0.902 | 0.886 | 0.958 | 0.904   | 0.977 |
| CDK          | 1.167 | 1.006 | 1.087 | 0.997   | 1.19  |
| CDK          | 0.973 | 0.972 | 0.97  | 0.949   | 0.998 |
| PDGFR        | 1.032 | 1.023 | 1.001 | 45.706  | 1.175 |
| PDGFR        | 1.005 | 0.946 | 1.062 | 0.98    | 1.075 |
| BCL          | 0.999 | 0.978 | 1.028 | 25.377  | 1.082 |
| AKT          | 1.037 | 1.017 | 1.088 | 1.147   | 1.058 |
| Average RMSE | 1.001 | 0.972 | 1.028 | 42.846  | 1.083 |

Table S14. Statistical significance of the predictive performances on the GDSC data set. P-values from one-sided paired Wilcoxon Sign-Rank test corresponding to the values shown in Table S11, S12 and S13.

|                      | RF   | sPLS | SVM  | SGL  |
|----------------------|------|------|------|------|
| Spearman Correlation | 0.17 | 0.01 | 0.3  | 0.05 |
| Pearson Correlation  | 0.26 | 0.01 | 0.14 | 0.01 |
| RMSE                 | 0.96 | 0.03 | 0.04 | 0    |

Table S15. Spearman correlations of predictions for individual drug groups in FIMM data set in comparison to Random Forest (RF), sparse Partial Least Squares (sPLS), Sparse Group Lasso (SGL) and Support Vector Machine (SVM).

|                     | MVLR  | RF     | sPLS   | SVM   | SGL   |
|---------------------|-------|--------|--------|-------|-------|
| MTOR                | 0.566 | 0.494  | 0.518  | 0.51  | 0.466 |
| PI3K/MTOR           | 0.533 | 0.501  | 0.438  | 0.462 | 0.427 |
| PI3K                | 0.362 | -0.017 | 0.286  | 0.366 | 0.007 |
| PLK                 | 0.132 | 0.229  | -0.275 | 0.056 | 0.231 |
| ABL                 | 0.219 | 0.084  | 0.251  | 0.303 | 0.304 |
| CDK                 | 0.202 | 0.477  | 0.421  | 0.397 | 0.366 |
| Average Correlation | 0.336 | 0.295  | 0.273  | 0.349 | 0.300 |

Table S16. Pearson correlations of predictions for individual drug groups in FIMM data set in comparison to Random Forest (RF), sparse Partial Least Squares (sPLS), Sparse Group Lasso (SGL) and Support Vector Machine (SVM).

|                     | MVLR  | RF     | sPLS   | SVM   | SGL   |
|---------------------|-------|--------|--------|-------|-------|
| MTOR                | 0.604 | 0.573  | 0.484  | 0.497 | 0.54  |
| PI3K/MTOR           | 0.499 | 0.521  | 0.381  | 0.409 | 0.36  |
| PI3K                | 0.332 | -0.005 | 0.278  | 0.368 | 0.079 |
| PLK                 | 0.085 | 0.138  | -0.169 | 0.057 | 0.251 |
| ABL                 | 0.185 | 0.079  | 0.193  | 0.224 | 0.231 |
| CDK                 | 0.18  | 0.454  | 0.451  | 0.356 | 0.285 |
| Average Correlation | 0.314 | 0.293  | 0.270  | 0.319 | 0.291 |

Table S17. RMSE of predictions for individual drug groups in FIMM data set in comparison to Random Forest (RF), sparse Partial Least Squares (sPLS), Sparse Group Lasso (SGL) and Support Vector Machine (SVM).

|              | MVLR  | RF    | PLS   | SVM   | SGL   |
|--------------|-------|-------|-------|-------|-------|
| MTOR         | 0.997 | 1.028 | 1.123 | 1.126 | 1.069 |
| PI3K/MTOR    | 0.968 | 0.956 | 1.074 | 1.055 | 1.106 |
| PI3K         | 0.907 | 0.991 | 0.925 | 0.947 | 1.001 |
| PLK          | 0.986 | 0.954 | 1.51  | 1.047 | 1.05  |
| ABL          | 1.013 | 1.006 | 1.008 | 1.028 | 1.002 |
| CDK          | 1.393 | 0.95  | 0.994 | 1.083 | 1.177 |
| Average RMSE | 1.044 | 0.981 | 1.106 | 1.048 | 1.068 |
